# Supplementary material for: How does abstract and concrete garbage classification signage influence waste sorting behavior?
Source: PeerJ. 2023 Dec 5;11:e16597. doi: 10.7717/peerj.16597 (PMC10704987; doi:10.7717/peerj.16597)
Supplement: Supplemental Information 2 [file peerj-11-16597-s002.xlsx]

## Sheet: Sheet1
Experiment 1																					Experiment 2
Subject	Stats	Abstract classification signage (ms)									Concrete classification signage (ms)										Subject	Stats	Traditional condition (ms)				Nudging condition (ms)
		food	batteries	chemicals	tubes	glass	metal	paper	plastic	textiles	food	batteries	chemicals	tubes	glass	metal	paper	plastic	textiles				food	hazardous	recyclable	residual	food	hazardous	recyclable	residual
1	Mean bin.RT	487.96	468.63	521.13	526.29	506.17	493.5	489.08	518.33	474	443.63	393.5	439.88	441.42	409.33	396.79	395.75	480.13	414.54		1	Mean bin.RT	902.44	914.56	890.63	909.25	892.44	906.38	881.75	927.16
2	Mean bin.RT	420.79	465.21	480.75	488.17	447.92	470.38	432.88	496.54	482.92	431.75	401.67	433.92	414.04	405.5	466.88	412.92	466	386.46		2	Mean bin.RT	909.84	1049.84	1006.25	1071.48	903.41	949.91	953.85	949.69
3	Mean bin.RT	565	591.63	603.46	627.25	595.5	551.88	573.54	596.5	563.75	618.67	528.83	581.96	581.75	570.08	599.83	576.29	586.83	570.04		3	Mean bin.RT	1090.84	1189.73	1098.58	1165.23	1102.87	1119.06	1103.86	1132.53
4	Mean bin.RT	462.54	540.08	546.38	509.67	527.17	508.63	490.88	444.92	551.13	480.17	489.42	533.79	503.04	527.54	553.33	524.63	528.18	475.38		4	Mean bin.RT	1001.56	1182.45	1005.23	1097.34	1012.91	1116.9	993.66	1004.77
5	Mean bin.RT	862.38	868.83	875.74	912.67	767.25	852.61	874.33	927.3	880.67	857.25	732.42	780.33	833.92	816.25	753.96	821.08	757.71	814.13		5	Mean bin.RT	1002.94	1101.09	983.59	1017.16	979.41	1030.41	1018.42	997.45
6	Mean bin.RT	540.25	580.71	584.38	649.91	599	614.79	574.13	582.21	599.3	530.38	528.75	639.25	527.21	514.58	547.96	512.25	613.08	575.63		6	Mean bin.RT	1040.09	1156.63	1012.94	1168.61	1003.74	1100.94	986.34	1094.19
7	Mean bin.RT	465.54	466.17	447.46	577.54	528.79	600.26	482.83	462.29	472.71	567.04	483.08	518.13	539.83	500.26	476	433.42	632.13	464.54		7	Mean bin.RT	1140.52	1193.25	1063.75	1107.09	1117.22	1169.63	1043.32	1144.97
8	Mean bin.RT	552.04	542.54	572.79	508.96	459.54	512.88	460	492.08	496	485.08	493.25	533.17	518.71	570.96	527.92	515.79	534.04	497.79		8	Mean bin.RT	1164	1203.13	1213.03	1252.84	1056.91	1103.78	1110.9	1054.22
9	Mean bin.RT	544.5	552.96	548.92	533.67	524.92	555	534.67	529.17	580.13	490.25	439.83	495.04	451.63	482.13	416.17	443.75	474	436.29		9	Mean bin.RT	979.53	978.94	908.81	1003.94	954.22	1003.19	923.31	952
10	Mean bin.RT	475.25	499.17	469.63	520.67	456.5	447.54	474.46	441.58	473.29	443.54	407.46	459.96	417.67	409.79	432.83	437.54	437	396.04		10	Mean bin.RT	993.32	1033.28	1036.47	1055.66	1059.45	1058.03	1034.66	1008.47
11	Mean bin.RT	454.04	464.17	463.63	498.52	524.63	592.13	461	558.91	453.41	456.38	442	435.96	425.13	436.95	468.46	435.42	566.54	451.88		11	Mean bin.RT	1176.67	1220.59	1164.53	1107.68	1116.53	1159.81	1061.07	1085.23
12	Mean bin.RT	584.5	649.52	569.91	681.5	577.71	627.65	558.75	596.33	577.25	475.96	454.96	577	499.75	524.21	496.86	451.88	543.71	505.88		12	Mean bin.RT	879.97	885.47	892.1	965.13	927.44	922.97	920.25	960.16
13	Mean bin.RT	608.79	585.13	777.92	704.42	775.63	717.08	595.54	637.83	616.88	591.09	538.63	629.87	518.67	691.33	592	503.91	585.04	539.67		13	Mean bin.RT	976.22	919.53	878.09	937.22	938.19	951.87	927.31	945.59
14	Mean bin.RT	533.54	546.17	528.42	546.79	572.08	547.92	515.33	531.04	529.96	533.96	516.42	548.42	540.08	534.17	504.17	508.83	624.46	515.04		14	Mean bin.RT	1046.75	1153.35	1143.38	1063.23	1010.09	1063.75	1046.17	989.34
15	Mean bin.RT	633.46	646.79	668.52	701	757.38	783.54	706.04	665.25	686.58	715.33	602.42	602	601.5	532.5	621.83	569.13	628.46	591.88		15	Mean bin.RT	1000.88	1018.25	1013.69	977.22	963.91	951.66	945.25	920.72
16	Mean bin.RT	554	581.58	588.08	621.25	660.04	660.32	526.25	616.92	599.88	502.96	474.25	531.04	498.33	529.04	521.13	513	590.04	495.38		16	Mean bin.RT	1049.44	1074.38	1127.5	1103.1	1072.65	1159.84	1137.43	1131.84
17	Mean bin.RT	488.42	576.92	611.23	709.77	640.38	613.04	526.09	559.5	562.88	501.08	477.83	535.21	463.5	500.05	460.83	414.79	509.33	464.29		17	Mean bin.RT	1145.91	1111.59	1033.03	1070.81	1032.25	1034.88	988.67	1046.5
18	Mean bin.RT	623.58	662.61	645.13	667.42	663.33	658.42	609.78	615.29	688.67	620.63	573.58	665.13	552.67	644.46	607	594.71	643.5	539.67		18	Mean bin.RT	1212.62	1285.37	1230.56	1338.13	1081.25	1221.1	1193.91	1222.07
19	Mean bin.RT	450.63	454.92	471.54	647.06	562.75	541.5	412.33	509.63	524.38	436.46	412.58	489.83	443.83	443.67	436.48	474.13	429.42	421		19	Mean bin.RT	1008.61	1133.09	1087.22	1154.1	1085.38	1126.28	1077.28	1034.06
20	Mean bin.RT	511.96	515.42	605.63	603.5	584.58	612.61	592.08	593.13	642.3	452	408.71	500.54	442.63	443.75	481.08	407.79	543.33	412.54		20	Mean bin.RT	869.88	953.16	950.38	1028.47	843.97	953.94	898.06	984.66
21	Mean bin.RT	511.96	701.21	612.83	699.54	668.46	718.58	613.08	575.33	624.96	441.04	442.54	496.21	464.13	475	456.13	436.08	496.75	405.21		21	Mean bin.RT	895.22	1062.44	978	1100.19	937.63	919.44	954.77	1045.03
22	Mean bin.RT	785.42	865.91	877.7	842.9	809.23	860.48	734.92	823.57	777.87	594.04	619	584.38	612.75	626.92	584.25	513.42	659.33	529.42		22	Mean bin.RT	1116.65	1239.53	1204.6	1242.33	1152.6	1118.25	1233.25	1201.45
23	Mean bin.RT	440.08	444.58	454.92	431.75	460.08	484.78	412.67	450.58	413.83	464.08	472.67	517.58	476.92	438.83	468.38	441.88	503.04	446.92		23	Mean bin.RT	801.78	1038.19	918.07	993.47	806.72	1040.63	987.75	938.31
24	Mean bin.RT	523.71	503.88	564.75	492.33	617.63	624.58	539.71	485.42	565.22	484.83	434.33	504.96	428.25	450.54	449	407.13	483.38	447.29		24	Mean bin.RT	1076.06	1165.88	1106.38	1081	1018.25	1058.03	1026.87	1054.69
25	Mean bin.RT	693.46	702.43	726.63	791.09	746.04	838.35	697.96	734.08	750.96	689	691.75	683.42	676.29	716.65	705.33	595.13	885.33	653.21		25	Mean bin.RT	870.75	951.41	971.47	984.78	873.09	981.03	934	946.72
26	Mean bin.RT	458.13	541.25	489.96	472.7	504.5	540.88	473.46	486.79	470.04	452.29	414.42	475.42	470	461.65	440.33	443.92	488.21	455.96		26	Mean bin.RT	911	940	930.16	1095.25	948.1	1001.28	1004.13	996.53
27	Mean bin.RT	482.21	563.38	594.71	618.79	511.33	590.25	625.46	628.74	584.5	468.09	436.92	490.29	447.22	472.52	509.57	503.54	536.33	468.91		27	Mean bin.RT	1023.63	1029.97	1088.06	1172.19	1018.97	1019.88	1025.03	1182.13
28	Mean bin.RT	438.21	490.46	506	542.13	495.35	494.75	466.75	470.42	457.67	476.63	490.08	459.46	501.71	486.17	459	470.38	533.08	487.29		28	Mean bin.RT	963.84	1003.88	942.13	1021.34	929.5	954.59	942.59	969.94
29	Mean bin.RT	539.08	568.13	551.71	566.63	615	577.29	513.25	564.42	607.5	524.38	502.21	559.88	542.63	518.54	455.13	521.42	537.25	495.75		29	Mean bin.RT	1113	1137.9	1057.72	1174.61	1038.31	1141.56	1050.13	1087.47
30	Mean bin.RT	498.25	551.96	562.5	525.92	546.83	516	480.13	516.79	509.21	495.38	493.92	535.46	504.33	509.92	531.92	508.21	514.67	509.04		30	Mean bin.RT	1279.3	1078.06	1045.19	1075.88	1241.2	1048.69	1040.72	1024.52
Subject	Stats	Abstract classification signage (ms)									Concrete classification signage (ms)										Subject	Stats	Traditional condition (ms)				Nudging condition (ms)
		food	batteries	chemicals	tubes	glass	metal	paper	plastic	textiles	food	batteries	chemicals	tubes	glass	metal	paper	plastic	textiles				food	hazardous	recyclable	residual	food	hazardous	recyclable	residual
1	Mean bin.ACC	1	1	1	1	1	1	1	1	1	1	1	1	1	1	1	1	1	1		1	Mean bin.ACC	1	1	1	1	1	1	1	0.97
2	Mean bin.ACC	1	1	1	1	1	1	1	1	1	1	1	1	1	1	1	1	1	1		2	Mean bin.ACC	1	0.97	1	0.97	1	1	0.84	1
3	Mean bin.ACC	1	1	1	1	1	1	1	1	1	1	1	1	1	1	1	1	1	1		3	Mean bin.ACC	0.97	0.94	0.97	0.94	0.97	0.97	0.91	0.94
4	Mean bin.ACC	1	1	1	1	1	1	1	1	1	1	1	1	1	1	1	1	0.92	1		4	Mean bin.ACC	1	0.97	0.97	1	1	0.97	1	0.97
5	Mean bin.ACC	1	1	0.96	1	1	0.96	1	0.96	1	1	1	1	1	1	1	1	1	1		5	Mean bin.ACC	1	1	1	1	1	1	0.97	0.97
6	Mean bin.ACC	1	1	1	0.96	1	1	1	1	0.96	1	1	1	1	1	1	1	1	1		6	Mean bin.ACC	1	1	0.97	0.97	0.97	1	1	1
7	Mean bin.ACC	1	1	1	1	1	0.96	1	1	1	1	1	1	1	0.96	0.96	1	1	1		7	Mean bin.ACC	0.97	1	1	1	1	1	0.97	1
8	Mean bin.ACC	1	1	1	1	1	1	1	1	1	1	1	1	1	1	1	1	1	1		8	Mean bin.ACC	1	1	1	1	1	1	0.97	1
9	Mean bin.ACC	1	1	1	1	1	1	1	0.96	1	1	1	1	1	1	1	1	1	1		9	Mean bin.ACC	1	1	1	1	1	1	1	1
10	Mean bin.ACC	1	1	1	1	1	1	1	1	1	1	1	1	1	1	1	1	1	1		10	Mean bin.ACC	0.97	1	1	1	0.97	1	1	1
11	Mean bin.ACC	1	1	1	0.96	1	1	1	0.96	0.92	1	1	1	1	0.92	1	1	1	1		11	Mean bin.ACC	0.94	1	0.94	0.97	1	1	0.94	0.97
12	Mean bin.ACC	1	0.96	0.96	1	1	0.96	1	1	1	1	1	1	1	1	0.92	1	1	1		12	Mean bin.ACC	1	1	0.97	1	1	1	1	1
13	Mean bin.ACC	1	1	1	1	1	1	1	1	1	0.96	1	0.96	1	1	0.96	0.96	1	1		13	Mean bin.ACC	1	1	1	1	1	0.97	1	1
14	Mean bin.ACC	1	1	1	1	1	1	1	1	1	1	1	1	1	1	1	1	1	1		14	Mean bin.ACC	1	0.97	1	0.97	1	1	0.94	1
15	Mean bin.ACC	1	1	0.88	1	1	1	1	1	1	1	1	1	1	1	1	1	1	1		15	Mean bin.ACC	1	1	1	1	1	1	1	1
16	Mean bin.ACC	1	1	1	1	1	0.92	1	1	1	1	1	1	1	1	1	1	1	1		16	Mean bin.ACC	1	1	0.94	0.97	0.97	1	0.94	1
17	Mean bin.ACC	1	1	0.92	0.92	1	0.96	0.92	1	1	1	1	1	1	0.92	1	1	1	1		17	Mean bin.ACC	1	1	1	1	1	1	0.94	1
18	Mean bin.ACC	1	0.96	1	1	1	1	0.96	1	1	1	1	1	1	1	1	1	1	1		18	Mean bin.ACC	0.91	0.94	1	0.94	1	0.94	1	0.94
19	Mean bin.ACC	1	1	1	0.71	1	0.92	1	1	1	1	1	1	1	1	0.96	1	1	1		19	Mean bin.ACC	0.97	1	1	0.97	1	1	1	0.97
20	Mean bin.ACC	1	1	1	1	1	0.96	1	1	0.96	1	1	1	1	1	1	1	1	1		20	Mean bin.ACC	1	1	1	1	1	1	1	1
21	Mean bin.ACC	1	1	1	1	1	1	1	1	0.96	1	1	1	1	1	1	1	1	1		21	Mean bin.ACC	1	1	1	1	1	1	0.97	1
22	Mean bin.ACC	1	0.92	0.96	0.88	0.92	0.96	1	0.96	0.96	0.96	1	1	1	1	1	1	1	1		22	Mean bin.ACC	0.97	0.94	0.94	0.94	0.94	1	1	0.91
23	Mean bin.ACC	1	1	1	1	1	0.96	1	1	1	1	1	1	1	1	1	1	1	1		23	Mean bin.ACC	1	1	0.94	1	1	1	1	1
24	Mean bin.ACC	1	1	1	1	1	1	1	1	0.96	1	1	1	1	1	0.96	1	1	1		24	Mean bin.ACC	1	1	1	0.97	1	1	0.97	1
25	Mean bin.ACC	1	0.96	1	0.96	0.96	0.96	0.96	1	1	0.96	1	1	1	0.96	1	1	1	1		25	Mean bin.ACC	1	1	1	1	1	1	1	1
26	Mean bin.ACC	1	1	1	0.96	1	1	1	1	1	1	1	1	1	0.96	1	1	1	1		26	Mean bin.ACC	1	1	1	1	0.97	1	0.97	1
27	Mean bin.ACC	1	1	1	1	1	1	1	0.96	0.92	0.96	1	1	0.96	0.96	0.96	1	1	0.96		27	Mean bin.ACC	1	0.97	1	1	1	1	0.97	1
28	Mean bin.ACC	1	1	1	1	0.96	1	1	1	1	1	1	1	1	1	1	1	1	1		28	Mean bin.ACC	1	1	1	1	1	1	1	1
29	Mean bin.ACC	1	1	1	0.67	1	1	1	1	1	1	1	1	1	1	1	1	1	1		29	Mean bin.ACC	0.97	0.97	1	0.97	1	1	1	0.94
30	Mean bin.ACC	1	1	1	1	1	1	1	1	1	1	1	1	1	1	1	1	1	1		30	Mean bin.ACC	0.94	0.97	1	1	0.94	1	1	0.91
